# Supplementary material for: Contribution of retrotransposition to developmental disorders
Source: PubMed Central journal article supplement (PMC6789007; doi:10.1038/s41467-019-12520-y), 2019-10-11
Supplement: 41467_2019_12520_MOESM3_ESM.pdf [file 41467_2019_12520_MOESM3_ESM.pdf]

## **Description of Additional Supplementary Files**

File Name: Supplementary Data 1

Description: Primers for validation of de novo MEIs

File Name: Supplementary Data 2

Description: Primers and analysis of potential mosaic MEIs
